# Supplementary material for: Evidence for the intrinsic nature of band-gap states electrochemically observed on atomically flat TiO2(110) surfaces
Source: Royal Society of Chemistry journal article supplement (doi:10.1039/c4cp03280b), 2014-01-01
Supplement: c4cp03280b1.pdf [file c4cp03280b1.pdf]

*Supplementary Information*

**Evidence for Intrinsic Nature of Band-Gap States Electrochemically Observed on  
Atomically Flat TiO<sub>2</sub>(110) Surfaces**

Shintaro Takata<sup>1</sup>, Yoshihiro Miura<sup>1</sup> and Yuji Matsumoto<sup>1,2\*</sup>

<sup>1</sup> Materials and Structures Laboratory, Tokyo Institute of Technology,  
4259 Nagatsuta, Midori-ku Yokohama 226-8503, Japan

<sup>2</sup> Department of Applied Chemistry, School of Engineering, Tohoku University  
6-6-07 Aramaki Aza Aoba, Aoba-ku Sendai, 980-8579 Japan

\* Corresponding author, e-mail: matsumoto@atomol.che.tohoku.ac.jp

---

### Supplementary S1:

A set of AFM images and RHEED patterns before and after UV illumination.

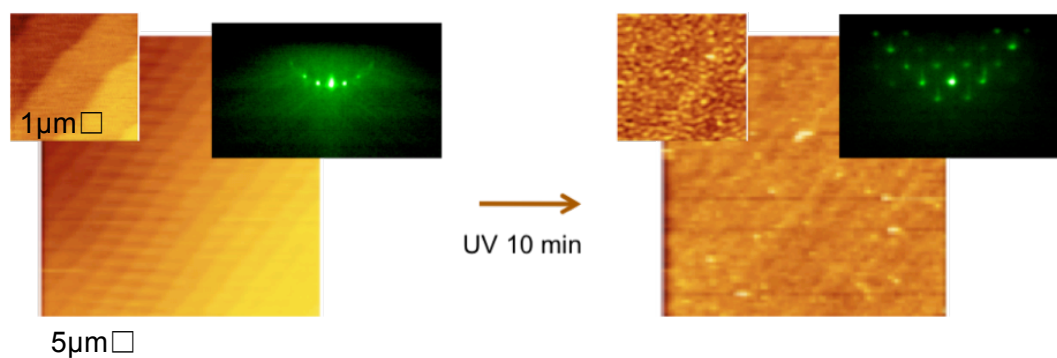

Figure S1 shows a set of AFM images and RHEED patterns for a different, but similar sample before and after UV illumination. After UV illumination, a spotty RHEED pattern that appears different from spots along a Laue circle characteristic to the  $\text{TiO}_2(110)-(1 \times 1)$  surface before UV illumination, resulted from transmission of the primary beam through asperities rising above the plane of a rough surface, was observed and consequently the surface morphology, which had been atomically flat before UV illumination, became rough, but still can be seen the original steps-and-terraces structure. This result is a direct evidence for the photoetching that has been inferred to occur during UV illumination, but it is very limited to near the surface region.

## Supplementary S2:

### Estimation of the defect density by a simple analytical model

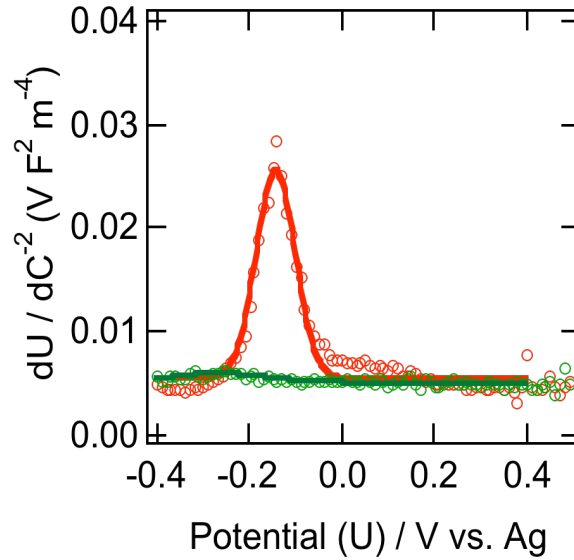

The defect density was estimated using the analytical model proposed by Tomkiewicz in 1979(1). In this model, the following equations can be derived:

$$\frac{dU}{d(1/C^2)} = \frac{\epsilon\epsilon_0 e N_D}{2} + \frac{\epsilon\epsilon_0 e^2 N_D}{2C_H} \left( \frac{dN_{SS}^+}{d\Delta\phi_s} \right) \quad (1)$$

$$\Delta\phi_s = U - U_{fb} \quad (2)$$

$$\frac{dN_{SS}^+}{d\Delta\phi_s} = \frac{eN_t}{\sqrt{4\pi\lambda kT}} \exp\left(-\frac{e^2(U - U_t)^2}{4\lambda kT}\right) \quad (3)$$

$U$ : the electrode potential

$U_{fb}$ : the flat band potential

$U_t$ : the most probable potential

$N_D$ : the donor density

$N_{SS}^+$  the area concentration of ionized surface states

$N_t$ : the defect density of the surface states

$\epsilon_0$ : the vacuum permittivity

$\epsilon$ : the relative permittivity of  $\text{TiO}_2$  (=89) (2)

$C_H$ : the capacitance of the Helmholtz layer

$\lambda$ : the reorganization energy

$k$ : the Boltzmann constant

Figure S2 is a plot of the values taken from the derivative of the nonlinear Mott-Schottky plot as a function of  $U$ . It was fitted by Gaussian line shape to compare with the following theoretical function obtained by combining Eqs. (1)~(3).

$$\frac{dU}{d(1/C^2)} = y_0 + A \exp\left(-\frac{(U - x_0)^2}{width}\right) \quad (4)$$

Then each quantity can be obtained using the value of the Helmholtz layer capacitance  $C_H$   $63\mu\text{C}/\text{cm}^2$  (1) as follows:

$$N_D = \frac{2y_0}{\epsilon\epsilon_0 e}$$

$$U_i = x_0$$

$$N_t = \frac{C_H A \sqrt{width}}{e y_0} \sqrt{\pi}$$

$$\lambda = width / 4kT$$

Note that the values of reorganization energy ranged from 0.48 to 1.55eV, which is within a typical range of  $\lambda$  for semiconductors (3).

### Supplementary S3:

#### Behavior of the donor density $N_D$ near the surface region

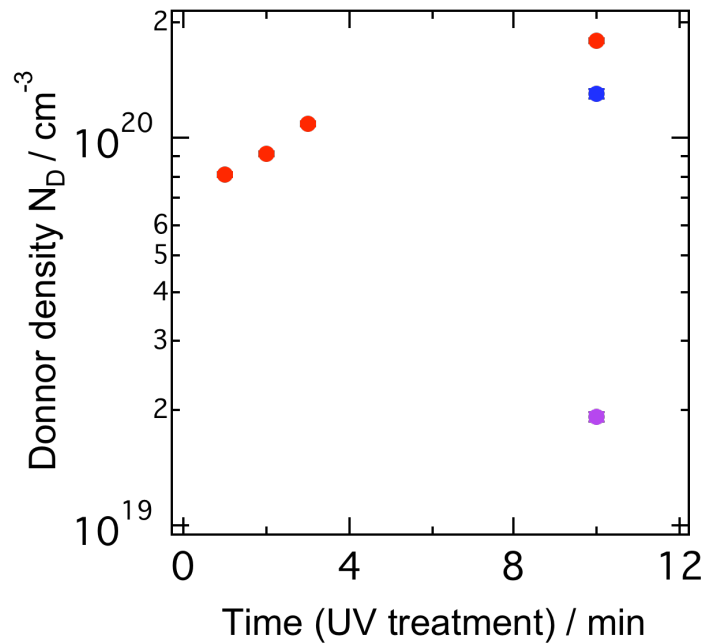

Figure S3 is a plot of the values of  $N_D$  as a function of UV illumination time (●), together with those after the subsequent reduction (●) and growing the TiO<sub>2</sub> film (●). With increasing the UV illumination time, the donor density increases, approaching to the nominal value of the Nb dopant concentration of  $1.4 \times 10^{20} \text{ cm}^{-3}$  (i.e. 0.5wt%). This indicates that the as-supplied Nb-doped TiO<sub>2</sub>(110) is likely to have a kind of dead layer near the surface region in which some of Nb dopants may become inactive. The photoetching process removes the dead layer, resulting in a fresh TiO<sub>2</sub> surface exposed. The donor density changed little or sometimes rather decreased even after the reduction, while the grown TiO<sub>2</sub> film had a small donor density of  $1.9 \times 10^{19} \text{ cm}^{-3}$  near the surface region. The origin of the donors is bulk oxygen vacancies and they can be easily re-oxidized near the film surface region during cooling the sample in O<sub>2</sub> (4).

## References

1. Tomkiewicz, M. The Potential Distribution at the TiO<sub>2</sub> Aqueous Electrolyte Interface. Tomkiewicz, M. *J. Electrochem. Soc.* **1979**, 126 (9), 1505-1510.
2. Grant, F. A. Properties of Rutile (Titanium Dioxide). *Rev. Mod. Phys.* **1959**, 31 (3), 646-674.
3. Nozik, A. J. and Memming, R. Physical Chemistry of Semiconductor–Liquid Interfaces. *J. Phys. Chem.* **1996**, 100, 13061-13078.
4. Takata, S.; Tanaka, R.; Hachiya, A. and Matsumoto, Y. Nanoscale Oxygen Nonstoichiometry in Epitaxial TiO<sub>2</sub> Films Grown by Pulsed Laser Deposition. *J. Appl. Phys.* 2011, 110, 103513-1-5.
